# Supplementary material
Source: publisher figshare collection journal article supplement (https://acs.figshare.com/ndownloader/files/4310170)
Supplement: Supplementary file 1 [file 4310170]

# Supplementary Material

## Structural Insights on Nitrogen-containing *Hydrothermal Carbon* using Solid-State MAS $^{13}\text{C}$ and $^{15}\text{N}$ NMR

*Niki Baccile<sup>1\*</sup>, Guillaume Laurent<sup>1</sup>, Cristina Coelho<sup>1</sup>, Florence Babonneau<sup>1</sup>, Li Zhao<sup>2</sup>,*

*Maria-Magdalena Titirici<sup>2</sup>*

1-UPMC Univ Paris 06 and CNRS, UMR 7574, Chimie de la Matière Condensée de Paris, F-75005, Paris, France

2-Max-Planck Institute for Colloids, Research Campus Golm, D-14424 Potsdam, Germany

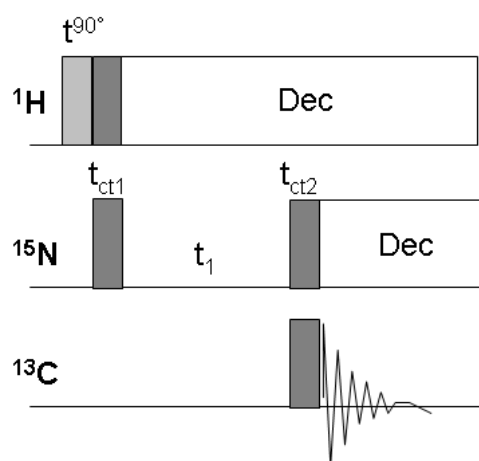

**Sup Mat Figure 1 - Scheme of the double cross polarization  $^{15}\text{N}\{^1\text{H}\}$  and  $^{13}\text{C}\{^{15}\text{N}\}$  pulse sequence employed for the 2D  $^{15}\text{N}$ - $^{13}\text{C}$  experiment.**

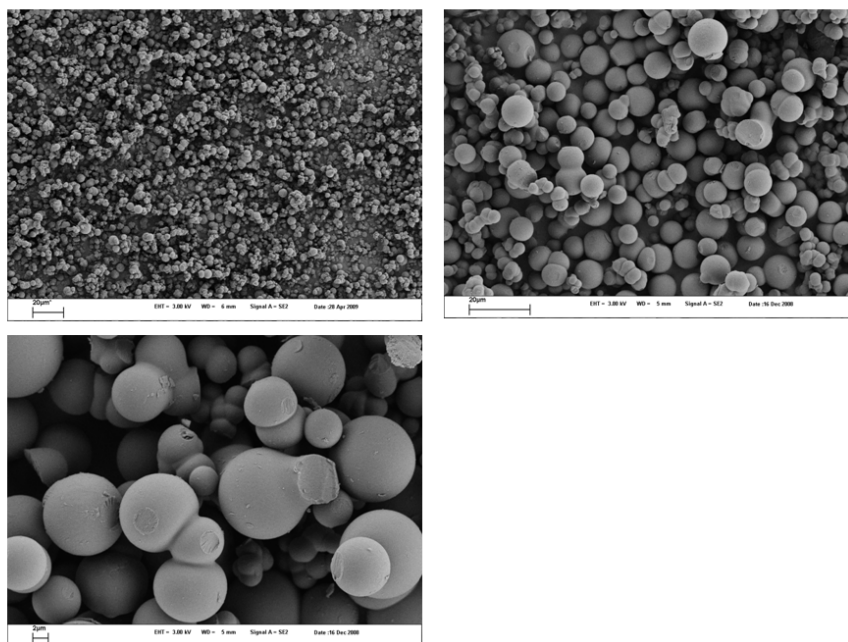

**Sup Mat Figure 2 - SEM images of the nitrogen-containing hydrothermal carbon particles obtained from the glucose/glycine mixture**

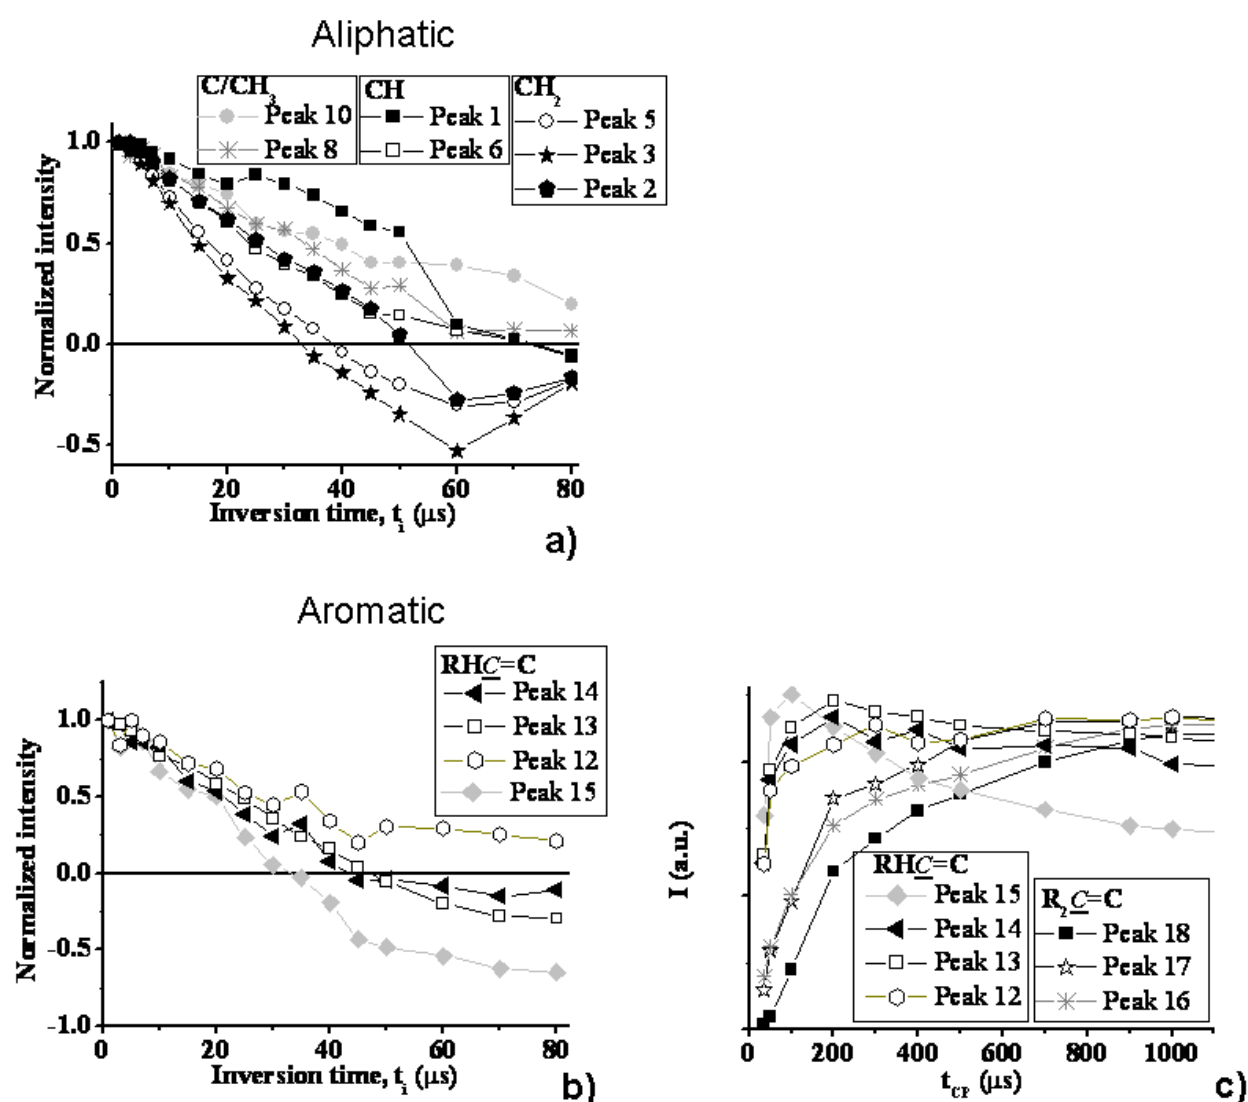

Sup Mat Figure 3 - *HC glu-C13-N15-gly*: evolution (normalized) of the  $^{13}\text{C}$  IRCP (a,b) and CP (c) and integrated intensities of selected peaks IRCP characteristics of the aliphatic (10-70 ppm) and aromatic (100-160 ppm) regions. Refer to Supp Mat Table 1 for the attribution of peaks. The variation  $I(t_i)$  in IRCP can be interpreted as follows:  $I > 0$  (C or  $\text{CH}_3$ );  $I \rightarrow 0$  (CH);  $I \rightarrow -1/3$  ( $\text{CH}_2$ ).

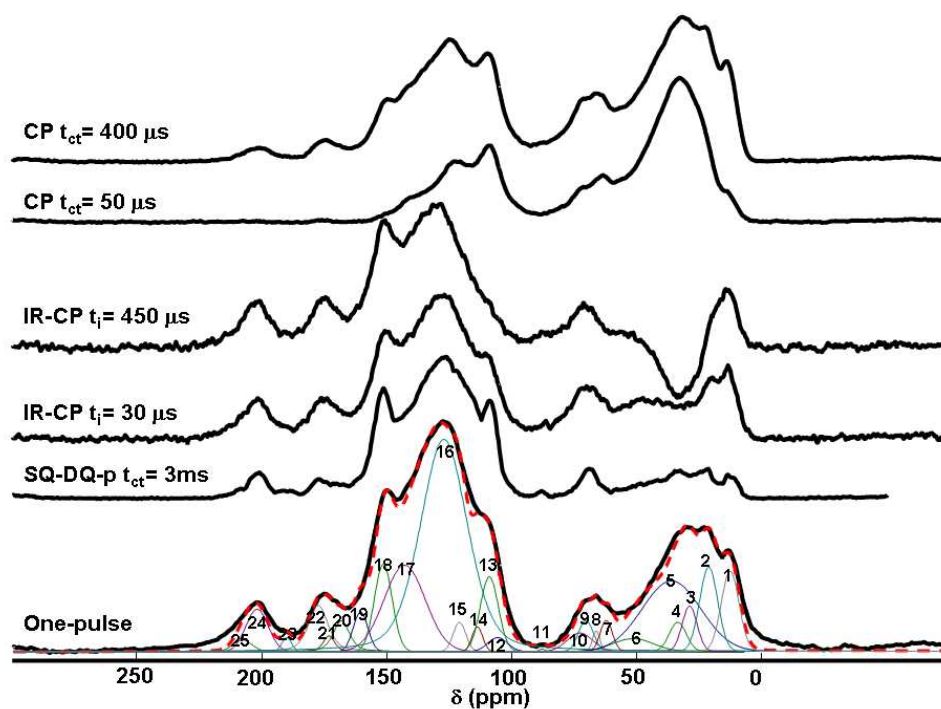

Sup Mat Figure 4 - *HC glu-C13-N15-gly*, from top to bottom. CP spectra obtained at  $t_c = 400$  and  $50 \mu s$ ; IR-CP experiments performed at inversion time,  $t_i = 450$  and  $30 \mu s$ ; SQ-DQ projection obtained for a  $^{13}C\{^1H\}$   $t_c = 3 ms$ ; one-pulse spectrum.

**Supp Mat Table 1 – Chemical shift listing and attribution of the peaks from 1 to 24 listed in Error!**  
Reference source not found.a.

| Peak | $\delta$ (ppm) | Attribution          |
|------|----------------|----------------------|
| 1    | 12.9           | CH <sub>3</sub>      |
| 2    | 21.4           | CH/CH <sub>2</sub>   |
| 3    | 29.0           | CH <sub>2</sub>      |
| 4    | 33.8           | -                    |
| 5    | 36.3           | CH <sub>2</sub>      |
| 6    | 51.7           | CH                   |
| 7    | 62.4           | CH <sub>2</sub>      |
| 8    | 66.5           | CH                   |
| 9    | 70.6           | C-NH                 |
| 10   | 73.0           | C                    |
| 11   | 88.2           | C or CH <sub>3</sub> |
| 12   | 106.7          | C=CH                 |
| 13   | 109.3          | C=CH <sub>2</sub>    |
| 14   | 114.1          | C=CH                 |
| 15   | 121.3          | C=CH                 |
| 16   | 127.5          | C=C; C=N             |
| 17   | 143.2          | C=C; C=N             |
| 18   | 151.8          | C=C                  |
| 19   | 160.9          | COOH                 |
| 20   | 168.6          | COOH                 |
| 21   | 173.6          | COOH                 |
| 22   | 177.8          | COOH                 |
| 23   | 190.5          | C=O                  |
| 24   | 202.4          | C=O                  |
| 25   | 207.2          | C=O                  |
